# Supplementary material for: Osteocalcin does not influence acute or chronic inflammation in human vascular cells
Source: PubMed Central journal article supplement (PMC6972510; doi:10.1002/jcp.29231), 2019-09-24

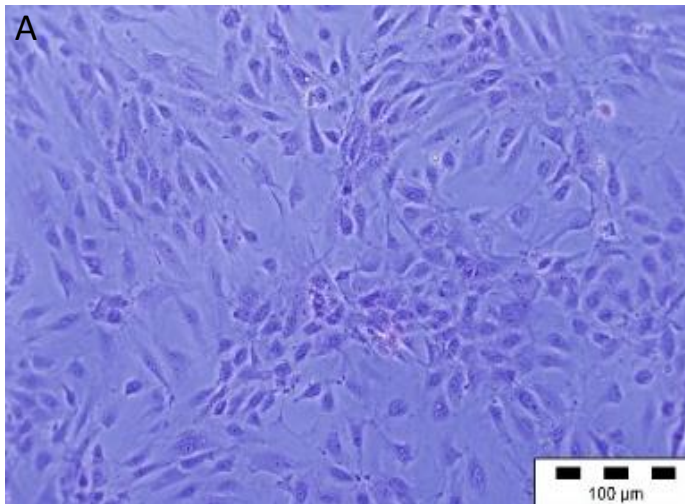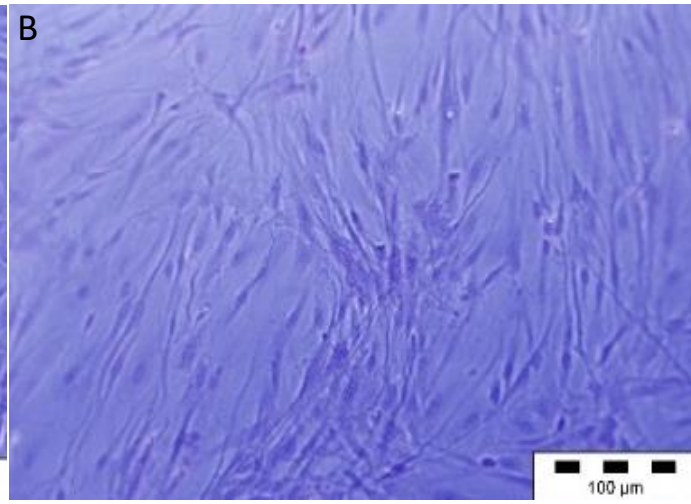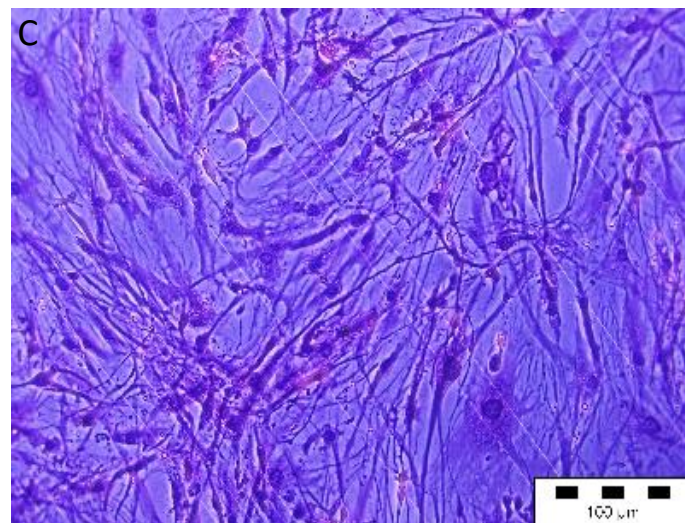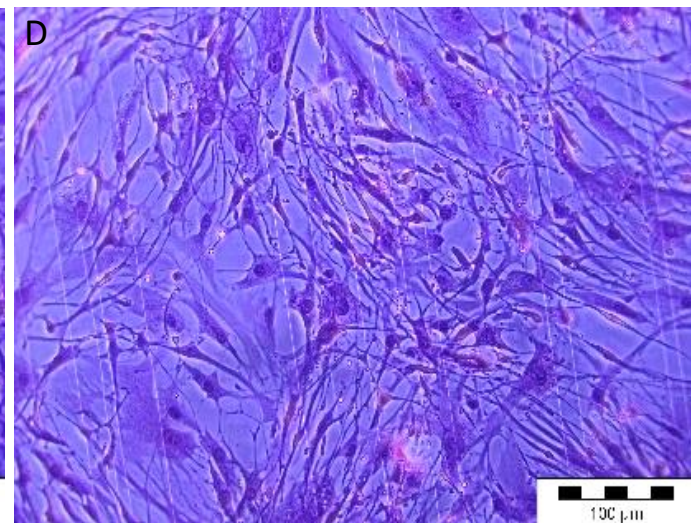

Supplement: JCP-235-3414-s001.pdf [file JCP-235-3414-s001.pdf]
